# Supplementary material for: Enhanced performance in isoindigo based organic small molecule field-effect transistors through solvent additives
Source: Royal Society of Chemistry journal article supplement (doi:10.1039/c5tc00605h), 2015-01-01
Supplement: c5tc00605h1.pdf [file c5tc00605h1.pdf]

## Supporting Information

### Enhanced performance in isoindigo based organic small molecules field effect transistors through solvent additives

Yu Jung Park,<sup>a,b,‡</sup> Jung Hwa Seo,<sup>a,‡</sup> Walaa Elsayy,<sup>c</sup> Bright Walker,<sup>b,\*</sup> Shinuk Cho,<sup>d,\*</sup> and Jae-Suk Lee<sup>c,\*</sup>

<sup>a</sup>Department of Materials Physics, Dong-A University, Busan, 604-714, Republic of Korea.

<sup>b</sup>School of Energy and Chemical Engineering, Ulsan National Institute of Science and Technology, Ulsan, 689-798, Republic of Korea

<sup>c</sup>Department of Nanobio Materials and Electronics and School of Material Science and Engineering, Gwangju Institute of Science and Technology (GIST), Gwangju 500-712, Republic of Korea.

<sup>d</sup>Department of Physics and EHSRC, University of Ulsan, Ulsan 680-749, Republic of Korea

#### 1. Output characteristics of isoindigo based small molecule FETs

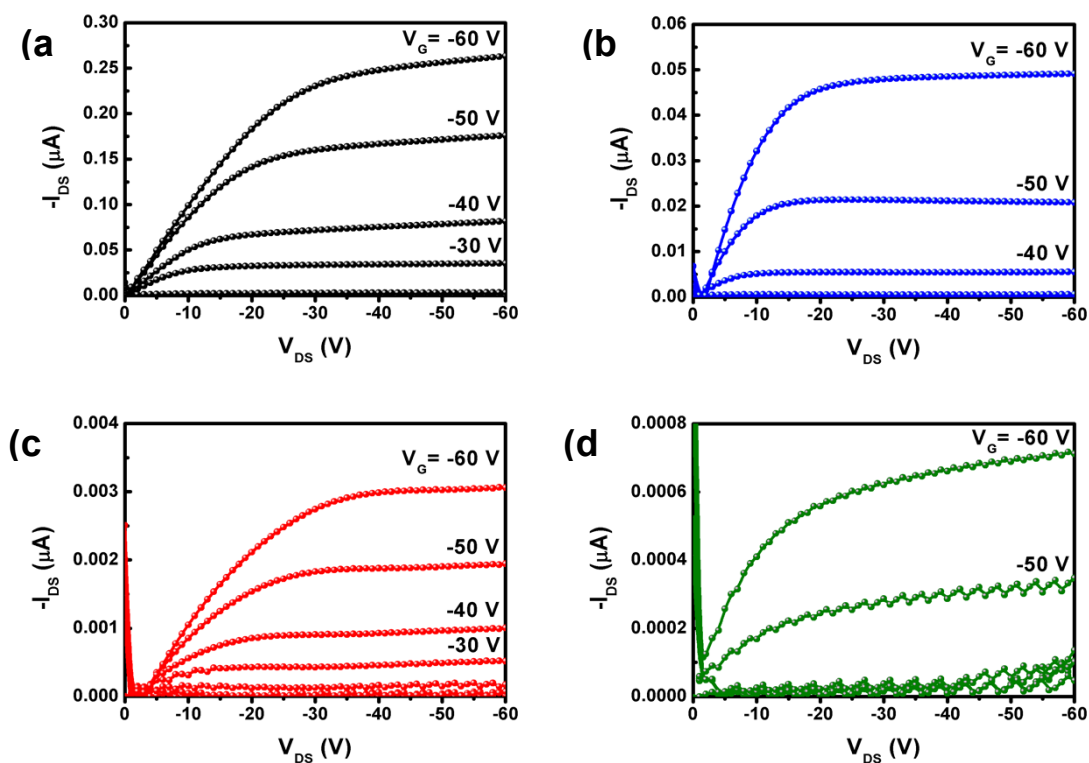

**Fig. S1** The best output characteristics of the FETs; (a) IDT with 0.2%, (b) ID2T with 0.2%, (c) ID3T with 0.2% and (d) IDED with 0.5% DIO.

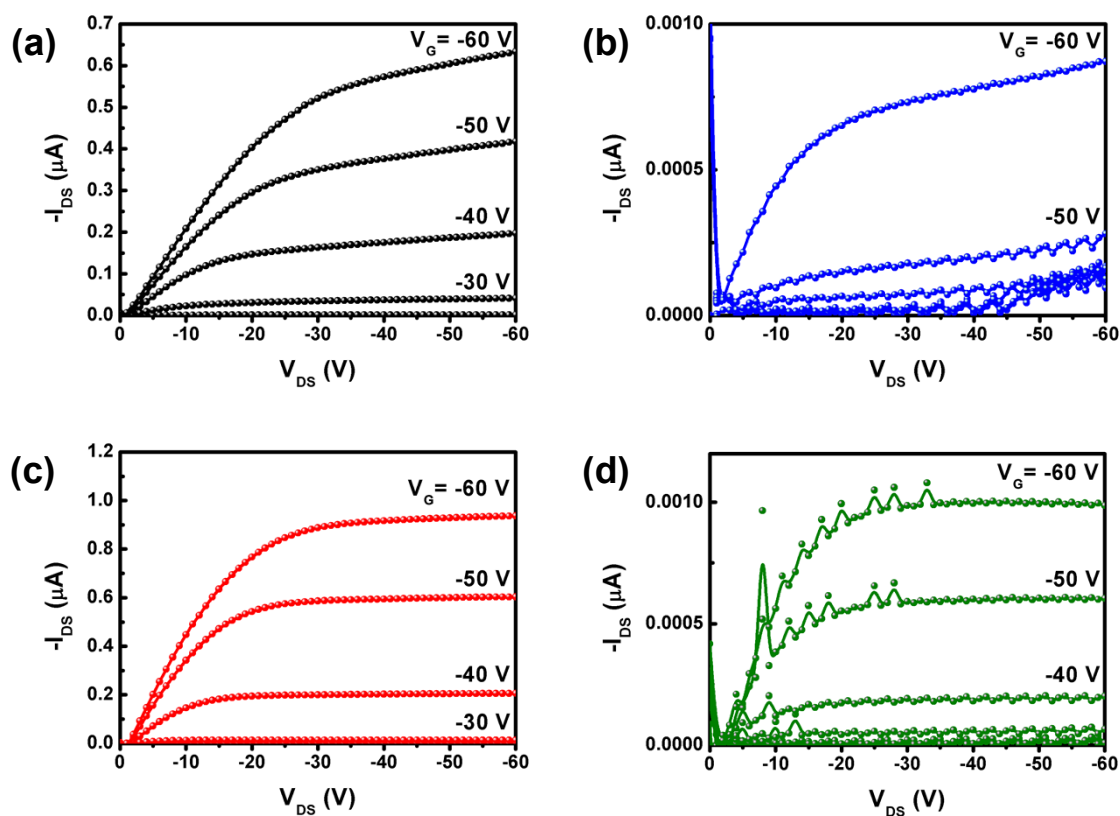

**Fig. S2** The best output characteristics of the FETs; (a) IDT with 0.5%, (b) ID2T with 0.2%, (c) ID3T with 0.2% and (d) IDDED with 1% CN.

## 2. UV-vis spectroscopy

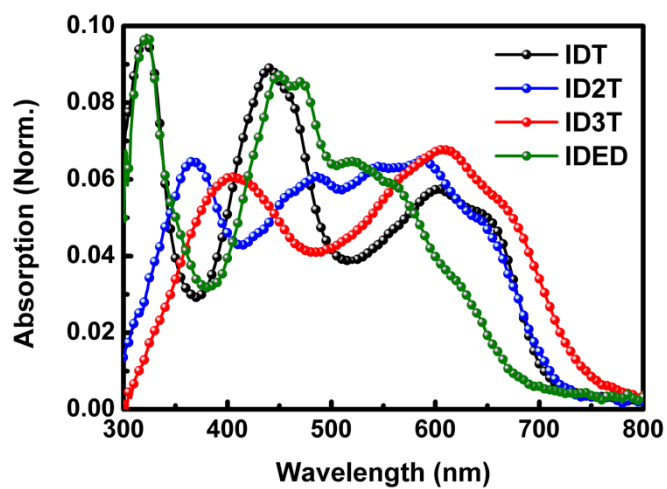

**Fig. S3** UV-vis absorption spectrum of isoindigo small molecules.

UV-vis spectra are in general agreement with spectra previously reported for this series of materials, showing similar absorption maxima with small differences in the intensity of shoulder features, which we attribute to subtle differences in environmental conditions in each laboratory during film fabrication.

### 3. Ultraviolet photoelectron spectroscopy (UPS)

Figure S4 displays the UPS spectra of isoindigo small molecules and Au as a reference. The right-side of Fig. S4 shows the HOMO onsets of isoindigo small molecules. The HOMO onsets of ID2T and ID3T shift toward lower binding energies relative to that of IDT. This indicates that the HOMO energy is decreased as a function of increase of thiophene number as the donor moiety. The HOMO levels of IDT, ID2T, ID3T and IDED are - 6.15, - 5.70, -

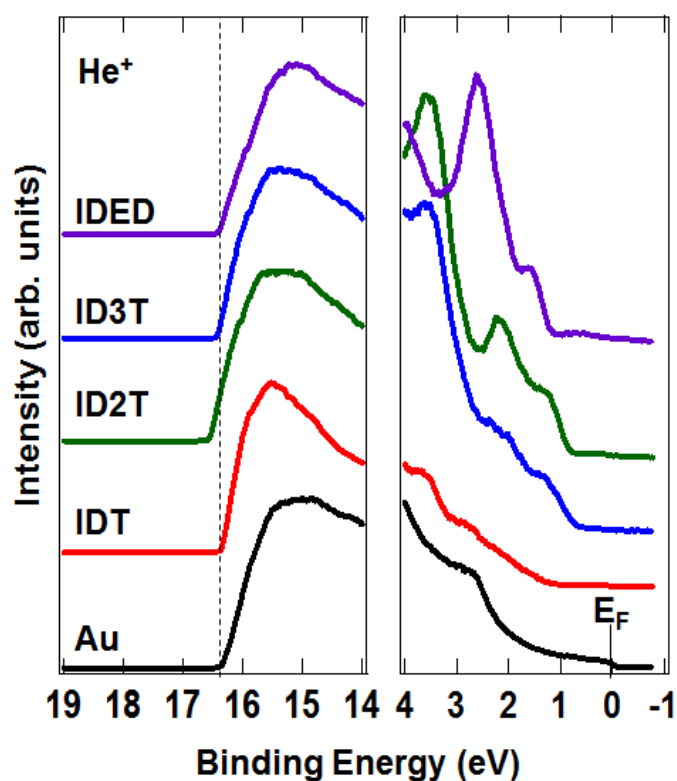

5.52 and - 6.03 eV, respectively.

**Fig. S4** UPS spectrum of isoindigo small molecules.

#### 4. Density functional theory (DFT) calculations

We performed density functional theory (DFT) calculations at the B3LYP/6-31G level using Gaussian 03 program in order to understand the electrical properties of isoindigo based small molecules. Figure S5 shows the charge-densities isosurfaces of the HOMO and LUMO levels of IDT, ID2T, ID3T and IDED. The charge-densities of the HOMO are generally delocalized on isoindigo based small molecules. In contrast, those of the LUMO are localized along the isoindigo backbone partially. Energy levels of isoindigo small

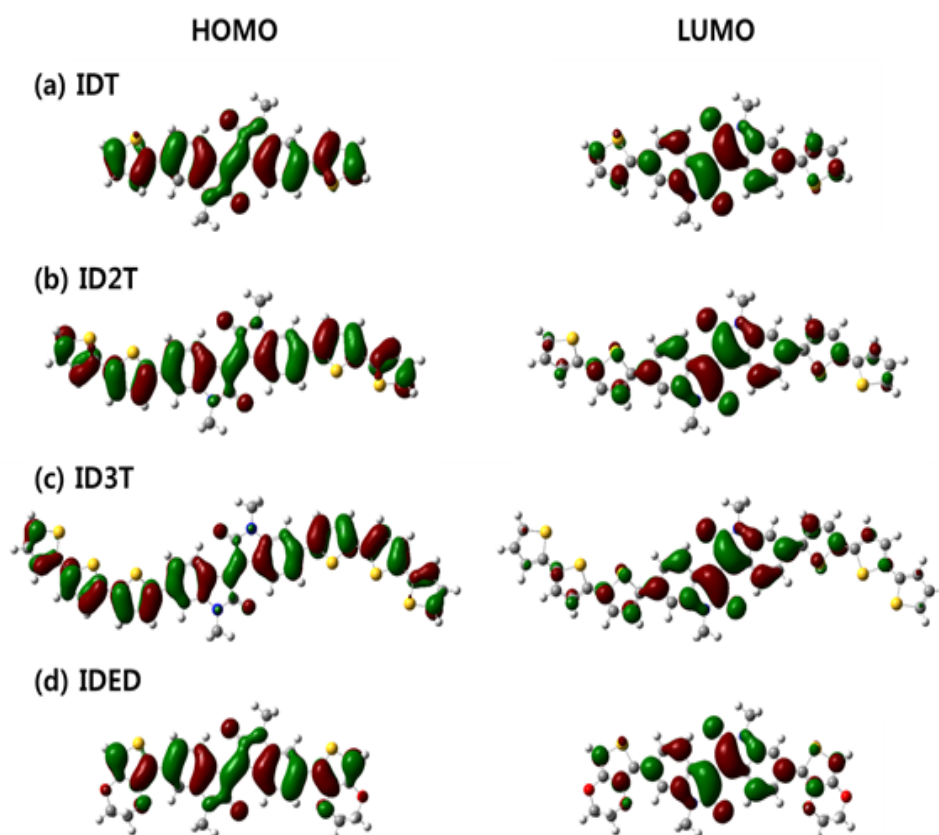

molecules are summarized in Table S1.

**Fig. S5** Charge-densities isosurfaces of the HOMO and LUMO levels of (a) IDT, (b) ID2T, (c) ID3T and (d) IDED.

## 5. Energy levels

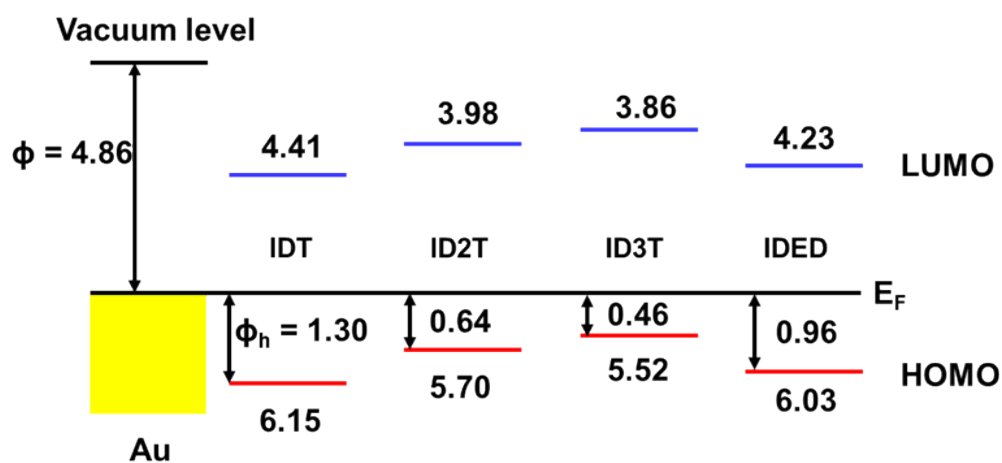

Fig. S6 (a) Energy levels of isoidindigo small molecules.

## 6. XRD diffraction pattern

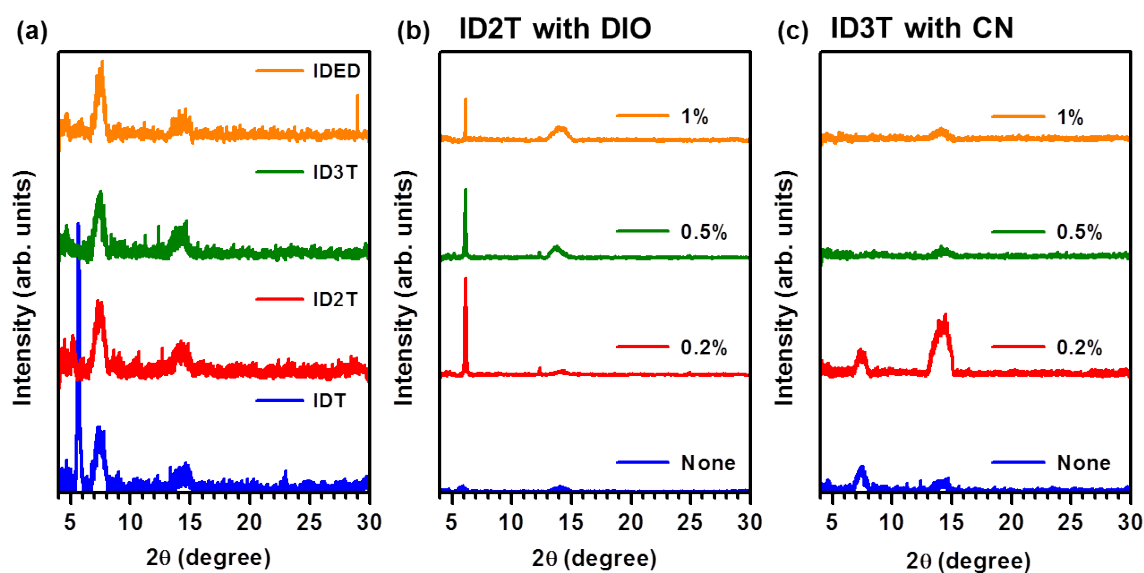

Fig. S7 XRD diffraction patterns of (a) four pristine isoidindigo, (b) ID2T films with DIO and (c) ID3T films with CN as a function of concentrations.
